# Supplementary material for: Speciation on the Rocks: Integrated Systematics of the Heteronotia spelea Species Complex (Gekkota; Reptilia) from Western and Central Australia
Source: PLoS One. 2013 Nov 11;8(11):e78110. doi: 10.1371/journal.pone.0078110 (PMC3823942; doi:10.1371/journal.pone.0078110)
Supplement: Table S1 — Summaries of morphological characters measured. Body proportion variables were used in the multivariate analyses. (XLS) [file pone.0078110.s001.xls]

## Sheet: Sheet1
Table S1. Summaries of morphological characters measured. Body proportion variables were used in the multivariate analyses.
Character	Abbreviation	Measurement
Body proportions
Snout to vent length	SVL	From tip of the snout to cloaca
Trunk length	TrunkL	From axilla to groin
Head length	HeadL	From tip of snout to retroarticular process
Ear-snout	EarSn	From tip of snout to anterior margin of tympanum
Head width	HeadW	At widest point
Foreleg length	ArmL	From elbow to tip of fourth finger
Leg length	LegL	From upper surface of knee to tip of fourth toe
Orbit length	OrbL	From anterior to posterior corners of eye
Tympanum length	EarL
Scale and other characters
Supralabial scales	SupLab	Number of enlarged supralabial scales (defined as being larger than surrounding scales)
Infralabial scales	InfLab	Number of enlarged infralabial scales (defined as being larger than surrounding scales)
Pre-cloacal pores	CloacPor	Number of pre-cloacal pores
Bands	Bands	Number of dark-coloured dorsal bands from nape to hind limbs.
